# Supplementary material
Source: publisher figshare collection journal article supplement (https://rs.figshare.com/ndownloader/files/15433007)
Supplement: Supplementary file 1 [file 15433007]

J. MURDOCH  
MITCHISON

BIBLIOGRAPHY

## Publications by Mitchison JM

|    |                                                                                                                                                                                              |
|----|----------------------------------------------------------------------------------------------------------------------------------------------------------------------------------------------|
| 1  | Mitchison JM. Birefringence of amoebae. <i>Nature</i> . 1950;166(4216):313-4.                                                                                                                |
| 2  | Mitchison JM. Thickness and structure of the membrane of the human red cell ghost. <i>Nature</i> . 1950;166(4217):347-8.                                                                     |
| 3  | Perutz MF, Mitchison JM. State of haemoglobin in sickle-cell anaemia. <i>Nature</i> . 1950;166(4225):677-9.                                                                                  |
| 4  | Swann MM, Mitchison JM. Refinements in polarized light microscopy. <i>The Journal of Experimental Biology</i> . 1950;27(2):226-237.                                                          |
| 5  | Swann MM, Mitchison JM. Birefringence of cytoplasm and cell membranes. <i>Progress in Biophysics and Biophysical Chemistry</i> . 1951;2:1-16.                                                |
| 6  | Mitchison JM. Cell membranes and cell division. <i>Symposia of the Society For Experimental Biology</i> . 1952;6:105-125.                                                                    |
| 7  | Mitchison JM, Swann MM. Optical changes in the membranes of the sea-urchin egg at fertilization, mitosis and cleavage. <i>The Journal of Experimental Biology</i> . 1952;29(3):357-362.      |
| 8  | Mitchison JM. A polarized light analysis of the human red cell ghost. <i>The Journal of Experimental Biology</i> . 1953;30(3):397-432.                                                       |
| 9  | Mitchison JM, Swann MM. Measurements on sea-urchin eggs with an interference microscope. <i>Quarterly Journal of Microscopical Science</i> . 1953;94(4):381-389.                             |
| 10 | Mitchison JM. Microdissection experiments on sea-urchin eggs at cleavage. <i>The Journal of Experimental Biology</i> . 1953;30(4):515-524.                                                   |
| 11 | Mitchison JM. Observations on ultra-centrifuging of human red cell ghosts. <i>Experimental Cell Research</i> . 1953;4(2):487-9.                                                              |
| 12 | Mitchison JM. The thickness of the sea urchin fertilisation membrane. <i>Experimental Cell Research</i> . 1953;5(2):536-8.                                                                   |
| 13 | Swann MM, Mitchison JM. Cleavage of sea-urchin eggs in colchicine. <i>The Journal of Experimental Biology</i> . 1953;30(4):506-514.                                                          |
| 14 | Mitchison JM, Swann MM. The mechanical properties of the cell surface .1. The cell elastimeter. <i>The Journal of Experimental Biology</i> . 1954;31(3):443-460.                             |
| 15 | Mitchison JM, Swann MM. The mechanical properties of the cell surface .2. The unfertilized sea-urchin egg. <i>The Journal of Experimental Biology</i> . 1954;31(3):461-72.                   |
| 16 | Mitchison JM, Swann MM. The mechanical properties of the cell surface .3. The sea-urchin egg from fertilization to cleavage. <i>The Journal of Experimental Biology</i> . 1955;32(4):734-50. |
| 17 | Passano LM, Mitchison JM, Swann MM. Measurement of the growth of single cells with the interference microscope. <i>Biological Bulletin</i> . 1955;109(3):351.                                |
| 18 | Mitchison JM, Passano LM, Smith FH. An integration method for the interference microscope. <i>Quarterly Journal of Microscopical Science</i> . 1956;97(2):287-302.                           |
| 19 | Mitchison JM. Changes in the optical properties of the egg surface at fertilisation. <i>Experimental Cell Research</i> . 1956;10(2):309-15.                                                  |

|    |                                                                                                                                                                                                                        |
|----|------------------------------------------------------------------------------------------------------------------------------------------------------------------------------------------------------------------------|
| 20 | Mitchison JM. Microscopic and submicroscopic changes of the cytoplasm. <i>Experimental Cell Research</i> . 1956;10(2):316-9.                                                                                           |
| 21 | Mitchison JM. The mechanical properties of the cell surface .4. The effect of chemical agents and of changes in pH on the unfertilized sea-urchin egg. <i>The Journal of Experimental Biology</i> . 1956;33(3):524-32. |
| 22 | Mitchison JM. The thickness of the cortex of the sea-urchin egg and the problem of the vitelline membrane. <i>Quarterly Journal of Microscopical Science</i> . 1956;97(1):109-121.                                     |
| 23 | Mitchison JM. The growth of single cells.1. <i>Schizosaccharomyces pombe</i> . <i>Experimental Cell Research</i> . 1957;13(2):244-62.                                                                                  |
| 24 | Walker PMB, Mitchison JM. DNA synthesis in 2 ciliates. <i>Experimental Cell Research</i> . 1957;13(1):167-70.                                                                                                          |
| 25 | Mitchison JM. The growth of single cells. 2. <i>Saccharomyces-cerevisiae</i> . <i>Experimental Cell Research</i> . 1958;15(1):214-21.                                                                                  |
| 26 | Swann MM, Mitchison JM. The mechanism of cleavage in animal cells. <i>Biological Reviews of the Cambridge Philosophical Society</i> . 1958;33(1):103-35.                                                               |
| 27 | Mitchison JM, Walker PMB. RNA synthesis during the cell life cycle of a fission yeast <i>Schizosaccharomyces pombe</i> . <i>Experimental Cell Research</i> . 1959;16(1):49-58.                                         |
| 28 | Mazia D, Mitchison JM, Medina JH, Harris P. Direct isolation of mitotic apparatus. <i>Journal of Biophysical and Biochemical Cytology</i> . 1961;10(4):467-474.                                                        |
| 29 | Mitchison, JM. The growth of single cells. 3. <i>Streptococcus faecalis</i> . <i>Experimental Cell Research</i> . 1961;22:208-225.                                                                                     |
| 30 | Mitchison, JM. Some questions for the cell. In "The Cell and the Organism" Ed. Ramsay, JA and Wigglesworth, VB. Cambridge University Press. 1961.                                                                      |
| 31 | Gross PR, Mitchison JM. Messenger RNA and cell cycle in a fission yeast. <i>Biological Bulletin</i> . 1962;123(2):467.                                                                                                 |
| 32 | Gross PR, Mitchison JM. Messenger RNA in a fission yeast. <i>Nature</i> . 1962;195(4838):305-6.                                                                                                                        |
| 33 | Lederberg S, Mitchison JM. Interaction of ribosomes of <i>Schizosaccharomyces pombe</i> and <i>Escherichia coli</i> . <i>Biochimica Et Biophysica Acta</i> . 1962;55(1-2):104-109.                                     |
| 34 | Mitchison JM, Lark KG. Incorporation of 3H-adenine into RNA during the cell cycle of <i>Schizosaccharomyces pombe</i> . <i>Experimental Cell Research</i> . 1962;28(2):452-455.                                        |
| 35 | Mitchison JM, Wilbur KM. Incorporation of protein and carbohydrate precursors during the cell cycle of a fission yeast. <i>Experimental Cell Research</i> . 1962;26(1):144-57.                                         |
| 36 | Mitchison JM, Kinghorn ML, Hawkins C. Growth of single cells .4. <i>Schizosaccharomyces pombe</i> at different temperatures. <i>Experimental Cell Research</i> . 1963;30(3):521-27.                                    |
| 37 | Mitchison JM. The cell cycle of a fission yeast. <i>Symp International Soc Cell Biol</i> . 2;151-160.                                                                                                                  |
| 38 | Mitchison JM. Patterns of Synthesis of RNA and other cell components during the cell cycle of <i>Schizosaccharomyces pombe</i> . <i>Journal of Cellular and Comparative Physiology</i> . 1963;62:Suppl 1, 1-13         |

|    |                                                                                                                                                                                                                                                         |
|----|---------------------------------------------------------------------------------------------------------------------------------------------------------------------------------------------------------------------------------------------------------|
| 39 | Rabinovicz M, Hotchkiss RD, Mitchison JM, Taylor J, Littlefield J, Penniall R, et al. Discussion of Mazia D. <i>Journal of Cellular and Comparative Physiology</i> . 1963;62:136.                                                                       |
| 40 | Cummins JE, Mitchison JM. Method for making autoradiographs of yeast cells which retain pool components. <i>Experimental Cell Research</i> . 1964;34(2):406-409.                                                                                        |
| 41 | Mitchison JM, Cummins JE. Changes in acid-soluble pool during cell cycle of <i>Schizosaccharomyces pombe</i> . <i>Experimental Cell Research</i> . 1964;35(2):394-401.                                                                                  |
| 42 | Mitchison JM, Gross PR. Selective synthesis of messenger RNA in a fission yeast during a step-down, and its relation to the cell cycle. Bulk experiments. <i>Experimental Cell Research</i> . 1965;37(2):259-277.                                       |
| 43 | Mitchison JM, Vincent WS. Preparation of synchronous cell cultures by sedimentation. <i>Nature</i> . 1965;205:987-989.                                                                                                                                  |
| 44 | Mitchison JM. Some functions of the nucleus. <i>International Review of Cytology</i> . 1966;19:97-110.                                                                                                                                                  |
| 45 | Bostock CJ, Donachie WD, Masters M, Mitchison JM. Synthesis of enzymes and DNA in synchronous cultures of <i>Schizosaccharomyces pombe</i> . <i>Nature</i> . 1966;210(5038):808-810.                                                                    |
| 46 | Mitchison JM, Cummins JE. Uptake of valine and cytidine by sea-urchin embryos and its relation to the cell surface. <i>Journal of Cell Science</i> . 1966;1(1):35-47.                                                                                   |
| 47 | Mitchison JM, Vincent WS. A method of making synchronous cell cultures by density gradient centrifugation. In "Cell synchrony" Ed Cameron, IL & Padilla GM. Academic Press, NY. 1966;chapter 16, pp 328-331.                                            |
| 48 | Cummins JE, Mitchison JM. Adenine uptake and pool formation in fission yeast <i>Schizosaccharomyces pombe</i> . <i>Biochimica Et Biophysica Acta</i> . 1967;136(1):108-120.                                                                             |
| 49 | Mitchison JM. Enzyme synthesis in synchronous cultures. <i>Science</i> . 1969;165(3894):657-663.                                                                                                                                                        |
| 50 | Mitchison JM, Creanor J. Linear synthesis of sucrase and phosphatases during cell cycle of <i>Schizosaccharomyces pombe</i> . <i>Journal of Cell Science</i> . 1969;5(2):373-391.                                                                       |
| 51 | Mitchison JM, Cummins JE, Gross PR, Creanor J. Uptake of bases and their incorporation into RNA during cell cycle of <i>Schizosaccharomyces pombe</i> in normal growth and after a step-down. <i>Experimental Cell Research</i> . 1969;57(2-3):411-422. |
| 52 | Mitchison JM. Markers in the cell cycle. In "The cell cycle: gene-enzyme relationships". Ed Padilla GM, Whitson GL & Cameron IL. Academic Press, NY & London. 1969;chapter 17, pp 361-372.                                                              |
| 53 | Mitchison JM. Physiological and cytological methods for <i>Schizosaccharomyces pombe</i> . <i>Methods in Cell Biology</i> . 1970;4:131-165.                                                                                                             |
| 54 | Mitchison JM, Creanor J. Induction synchrony in the fission yeast <i>Schizosaccharomyces pombe</i> . <i>Experimental Cell Research</i> . 1971;67:368-374.                                                                                               |
| 55 | Mitchison JM. <i>The Biology of the Cell Cycle</i> . 313pp. Cambridge University Press. 1971.                                                                                                                                                           |
| 56 | Mitchison JM. Cell cycle markers provided by enzyme synthesis. <i>Current Topics in Radiation Research Quarterly</i> . 1972;7:244-247.                                                                                                                  |

|    |                                                                                                                                                                                                                                                                                                                        |
|----|------------------------------------------------------------------------------------------------------------------------------------------------------------------------------------------------------------------------------------------------------------------------------------------------------------------------|
| 57 | Mitchison JM. Differentiation in the cell cycle. In "The cell cycle in development and differentiation". Ed Balls M, Billett, FS. Cambridge University Press. 1973; chapter 1, pp1-11.                                                                                                                                 |
| 58 | Mitchison JM. The cell cycle of a eukaryote. Symp Soc Gen Microbiol. 1973; 23:189-208.                                                                                                                                                                                                                                 |
| 59 | Mitchison JM, Creanor J. Further measurements of DNA synthesis and enzyme potential during cell cycle of fission yeast <i>Schizosaccharomyces pombe</i> . Experimental Cell Research. 1971;69(1):244-247.                                                                                                              |
| 60 | Fraser RSS, Creanor J, Mitchison JM. Rapid and selective-inhibition of synthesis of high molecular weight RNA in yeast by lomofungin. Nature. 1973;244(5413):222-4.                                                                                                                                                    |
| 61 | Sissons CH, Mitchison JM, Creanor J. Enzyme synthesis and potential during induction synchrony in fission yeast <i>Schizosaccharomyces pombe</i> . Experimental Cell Research. 1973;82(1):63-72.                                                                                                                       |
| 62 | Mitchison, JM, Creanor J, Sartirana, ML. Enzyme synthesis, RNA synthesis and the effects of actinomycin D in protoplasts of the fission yeast <i>Schizosaccharomyces pombe</i> . In "Yeasts, Mould and Plant Protoplasts", pp229-245. Eds Villanueva JR, Garcia-Acha I, Gascon S, Uruburu F. Academic Press, NY. 1973. |
| 63 | Mitchison, JM. Sequences, pathways and timers. In "Cell cycle controls", pp125-142. Ed Padilla GM, Cameron IL, Zimmerman AM. Academic Press, NY. 1974.                                                                                                                                                                 |
| 64 | Mitchison JM, Carter, BLA. Cell cycle analysis. "Methods in Cell Biology". 1975;11:chapter 11, pp 201-219. Academic Press, NY & London.                                                                                                                                                                                |
| 65 | Creanor J, May JW, Mitchison JM. Effect of 8-hydroxyquinoline on enzyme-synthesis in fission yeast <i>Schizosaccharomyces pombe</i> . European Journal of Biochemistry. 1975;60(2):487-93.                                                                                                                             |
| 66 | Padilla GM, Carter BLA, Mitchison JM. Germination of <i>Schizosaccharomyces pombe</i> spores separated by zonal centrifugation. Experimental Cell Research. 1975;93(2):325-30.                                                                                                                                         |
| 67 | Smith HTB, Mitchison JM. Anesthetics delay and accelerate division in fission yeast <i>Schizosaccharomyces pombe</i> . Experimental Cell Research. 1976;99(2):432-5.                                                                                                                                                   |
| 68 | Mitchison JM. Other types of cellular periodic systems. Group Report, in "The Molecular Basis of Circadian Rhythms", pp361-372. Ed Hastings JW, Schweiger H-G. Dahlem Konferenzen. West Berlin. 1976.                                                                                                                  |
| 69 | Mitchison JM. Cell cycle control models. In "Growth kinetics and biochemical regulation of normal and malignant cells", pp 23-33. Ed Drewinko B, Humphrey RM. Williams and Wilkins Co, Baltimore. 1976.                                                                                                                |
| 70 | Mitchison JM. Enzyme synthesis during the cell cycle. In "Cell differentiation in microorganisms, plants and animals", pp 377-401. Ed Nover L, Mothes K. VEB Gustav Fischer Verlag, Jena. 1977.                                                                                                                        |
| 71 | Mitchison JM. The timing of cell cycle events. In "Mitosis; facts and questions", pp1-19. Ed Little M, Paweletz N, Ponstingl H, Schroeter D, Zimmerman H-P. Springer Verlag, Berlin. 1977.                                                                                                                             |
| 72 | Mitchison JM. Relations between growth and division during cell-cycle. Journal of Supramolecular Structure. 1978:308.                                                                                                                                                                                                  |

|    |                                                                                                                                                                                                                                                                                              |
|----|----------------------------------------------------------------------------------------------------------------------------------------------------------------------------------------------------------------------------------------------------------------------------------------------|
| 73 | Mitchison JM. Relations between growth and division during the cell cycle. In "Cell reproduction", pp 93-102. Ed Dirksen ER, Prescott DM, Fox CF. Academic Press, New York. 1978.                                                                                                            |
| 74 | Creanor J, Mitchison JM. Reduction of perturbations in leucine incorporation in synchronous cultures of <i>Schizosaccharomyces pombe</i> made by elutriation. <i>Journal of General Microbiology</i> . 1979;112(JUN):385-88.                                                                 |
| 75 | Minet M, Nurse P, Thuriaux P, Mitchison JM. Uncontrolled septation in a cell-division cycle mutant of the fission yeast <i>Schizosaccharomyces pombe</i> . <i>Journal of Bacteriology</i> . 1979;137(1):440-46.                                                                              |
| 76 | Benitez T, Nurse P, Mitchison JM. Arginase and sucrase potential in the fission yeast <i>Schizosaccharomyces pombe</i> . <i>Journal of Cell Science</i> . 1980;46(DEC):399-431.                                                                                                              |
| 77 | Mitchison JM. Changing perspectives in the cell cycle. In "The Cell Cycle", Society for Experimental Biology Seminar Series, pp 1-10. Ed John PCL. Cambridge University Press. 1981.                                                                                                         |
| 78 | Creanor J, Mitchison JM. Patterns of protein synthesis during the cell-cycle of the fission yeast <i>Schizosaccharomyces pombe</i> . <i>Journal of Cell Science</i> . 1982;58(DEC):263-85.                                                                                                   |
| 79 | Creanor J, Elliott SE, Bisset YC, Mitchison JM. Absence of step changes in activity of certain enzymes during the cell-cycle of budding and fission yeasts in synchronous cultures. <i>Journal of Cell Science</i> . 1983;61(MAY):339-49.                                                    |
| 80 | Mitchison JM, Fantes PA. Inside yeast cells. Book Review: <i>The molecular biology of the yeast Saccharomyces: metabolism and gene expression</i> . Edited by Jeffrey N Strathern et al; Cold Spring Harbor Laboratory, 1983. <i>Nature</i> . 1983;304(5927):668.                            |
| 81 | Creanor J, Mitchison JM. Protein synthesis and its relation to the DNA-division cycle in the fission yeast <i>Schizosaccharomyces pombe</i> . <i>Journal of Cell Science</i> . 1984;69(JUL):199-210.                                                                                         |
| 82 | Mitchison JM. Dissociation of cell cycle events. In "Cell cycle clocks", pp 163-171. Ed Edmunds LN. Marcel Dekker, New York and Basel. 1984.                                                                                                                                                 |
| 83 | Mitchison J, Nurse P. Growth in cell length in the fission yeast <i>Schizosaccharomyces pombe</i> . <i>Journal of Cell Science</i> . 1985;75(APR):357-76.                                                                                                                                    |
| 84 | Mitchison JM, Creanor J. Periodic patterns of protein and enzyme synthesis during the cell-cycle of the fission yeast <i>Schizosaccharomyces pombe</i> . <i>Cell and Tissue Kinetics</i> . 1985;18(2):224-5.                                                                                 |
| 85 | Creanor JM, Mitchison J. Nucleoside diphosphokinase, an enzyme with step changes in activity during the cell-cycle of the fission yeast <i>Schizosaccharomyces pombe</i> . 1. Persistence of steps after a block to the DNA-division cycle. <i>Journal of Cell Science</i> . 1986;86:207-15. |
| 86 | May JW, Mitchison JM. Length growth in fission yeast cells measured by 2 novel techniques. <i>Nature</i> . 1986;322(6081):752-4.                                                                                                                                                             |
| 87 | Mitchison JM. Positive action. <i>Biologist</i> . 1986;33(5):248.                                                                                                                                                                                                                            |

|            |                                                                                                                                                                                                                                                                                                                      |
|------------|----------------------------------------------------------------------------------------------------------------------------------------------------------------------------------------------------------------------------------------------------------------------------------------------------------------------|
| <b>88</b>  | Novak B, Mitchison JM. Change in the rate of CO <sub>2</sub> production in synchronous cultures of the fission yeast <i>Schizosaccharomyces pombe</i> - a periodic cell-cycle event that persists after the DNA-division cycle has been blocked. <i>Journal of Cell Science</i> . 1986;86:191-206.                   |
| <b>89</b>  | Micklem HS, Mitchison JM. University of Edinburgh woes. <i>Nature</i> . 1987;328(6126):106.                                                                                                                                                                                                                          |
| <b>90</b>  | Novak B, Mitchison JM. Periodic cell-cycle changes in the rate of CO <sub>2</sub> production in the fission yeast <i>Schizosaccharomyces pombe</i> persist after a block to protein synthesis. <i>Journal of Cell Science</i> . 1987;87:323-5.                                                                       |
| <b>91</b>  | Mitchison JM. Synchronous cultures and age fractionation. In "Yeast: a practical approach", pp 51-63. Ed Campbell I, Duffus JH. IRL Press, Oxford and Washington DC. 1988.                                                                                                                                           |
| <b>92</b>  | Creanor J, Mitchison JM. Nucleoside diphosphokinase, an enzyme with step changes in activity during the cell-cycle of the fission yeast <i>Schizosaccharomyces pombe</i> . 2. Dissociation of the steps from the DNA-division cycle after induction synchronization. <i>Journal of Cell Science</i> . 1989;93:185-9. |
| <b>93</b>  | Harper JDI, Mitchison JM, Williamson RE, John PCL. Does the autoimmune serum 5051 specifically recognize microtubule organizing centers in plant cells? <i>Cell Biology International Reports</i> . 1989;13(5):471-83.                                                                                               |
| <b>94</b>  | Khar A, Mitchison JM. Observations on ultracentrifuging wild-type and mutant ( <i>cdc2.33</i> ) cells of <i>Schizosaccharomyces pombe</i> . <i>Journal of Cell Science</i> . 1989;92:345-48.                                                                                                                         |
| <b>95</b>  | Novak B, Mitchison JM. The 1st transition point of the mutant <i>cdc2.33</i> in the fission yeast <i>Schizosaccharomyces pombe</i> . <i>Journal of Cell Science</i> . 1989;94:657-62.                                                                                                                                |
| <b>96</b>  | Mitchison JM. Cell cycle growth and periodicities. In "Molecular Biology of the Fission Yeast", pp 205-242. Ed Nasim A, Young PG, Johnson BF. Academic Press, San Diego. 1989.                                                                                                                                       |
| <b>97</b>  | Creanor J, Mitchison JM. Continued DNA synthesis after a mitotic block in the double mutant <i>cut1 cdc11</i> of the fission yeast <i>Schizosaccharomyces pombe</i> . <i>Journal of Cell Science</i> . 1990;96:435-8.                                                                                                |
| <b>98</b>  | Mitchison JM. My Favourite Cell. The fission yeast, <i>Schizosaccharomyces pombe</i> . <i>Bioessays</i> . 1990;12(4):189-91.                                                                                                                                                                                         |
| <b>99</b>  | Novak B, Mitchison JM. Changes in the rate of oxygen-consumption in synchronous cultures of the fission yeast <i>Schizosaccharomyces pombe</i> . <i>Journal of Cell Science</i> . 1990;96:429-33.                                                                                                                    |
| <b>100</b> | Novak B, Mitchison JM. CO <sub>2</sub> production after induction synchrony of the fission yeast <i>Schizosaccharomyces pombe</i> - the origin and nature of entrainment. <i>Journal of Cell Science</i> . 1990;96:79-91.                                                                                            |
| <b>101</b> | Mitchison JM, Creanor J, Novak B. Coordination of growth and division during the cell-cycle of fission yeast. <i>Cold Spring Harbor Symposia on Quantitative Biology</i> . 1991;56:557-65.                                                                                                                           |
| <b>102</b> | Vicente-Soler J, Creanor J, Bisset YC, Mitchison JM. Changes in the activity of alcohol dehydrogenase during the cell-cycle of the fission yeast <i>Schizosaccharomyces pombe</i> . <i>Journal of Cell Science</i> . 1991;99:193-9.                                                                                  |

|            |                                                                                                                                                                                                                              |
|------------|------------------------------------------------------------------------------------------------------------------------------------------------------------------------------------------------------------------------------|
| <b>103</b> | Mitchison JM. Lord Swann. Biograph Memoirs Roy Soc London. 1991;37:447-460.                                                                                                                                                  |
| <b>104</b> | Novak B, Sveiczzer A, Mitchison JM. CO <sub>2</sub> production in cell-free extracts of fission yeast detects cell-cycle changes. Journal of Cell Science. 1993;105:529-31.                                                  |
| <b>105</b> | Mitchison JM. The cell cycle of fission yeast. In "The early days of yeast genetics", pp 315-323. Ed Hall MN, Linder P. Cold Spring Harbor Press, Cold Spring Harbor, NY. 1993.                                              |
| <b>106</b> | Creanor J, Mitchison JM. The kinetics of H1 histone kinase activation during the cell-cycle of wild-type and wee mutants of the fission yeast <i>Schizosaccharomyces pombe</i> . Journal of Cell Science. 1994;107:1197-204. |
| <b>107</b> | May JW, Mitchison JM. Pattern of polar extension of the cell wall in the fission yeast <i>Schizosaccharomyces pombe</i> . Canadian Journal of Microbiology. 1995;41(3):273-7.                                                |
| <b>108</b> | Creanor J, Mitchison JM. The kinetics of the B cyclin p56(cdc13) and the phosphatase p80(cdc25) during the cell cycle of the fission yeast <i>Schizosaccharomyces pombe</i> . Journal of Cell Science. 1996;109:1647-53.     |
| <b>109</b> | Mitchison JM. Cell Cycles. In "Foundations of Modern Biochemistry", chapter 2, pp203-230. Ed Ord MG, Stocken LA. JAI Press Inc, Greenwich, CT. 1996.                                                                         |
| <b>110</b> | Sveiczzer A, Novak B, Mitchison JM. The size control of fission yeast revisited. Journal of Cell Science. 1996;109:2947-57.                                                                                                  |
| <b>111</b> | Mitchison JM, Novak B, Sveiczzer A. Size control in the cell cycle. Cell Biology International. 1997;21(8):461-3.                                                                                                            |
| <b>112</b> | Mitchison JM, Sveiczzer A, Novak B. Authors reply - Length extension in growing yeast: is growth exponential? No. Microbiology UK. 1998;144:265-6.                                                                           |
| <b>113</b> | Sveiczzer A, Novak B, Mitchison JM. Mitotic control in the absence of cdc25 mitotic inducer in fission yeast. Journal of Cell Science. 1999;112(7):1085-92.                                                                  |
| <b>114</b> | Mitchison JM. Growth during the cell cycle. International Review of Cytology - a Survey of Cell Biology, Vol 226. 2003;226:165-258.                                                                                          |
| <b>115</b> | Sveiczzer A, Novak B, Mitchison JM. Size control in growing yeast and mammalian cells. Theoretical Biology and Medical Modelling. 2004;1.                                                                                    |
| <b>116</b> | Mitchison JM. Single cell studies of the cell cycle and some models. Theoretical Biology and Medical Modelling. 2005;2-4.                                                                                                    |
